# Supplementary material for: Rapamycin-based inhaled therapy for potential treatment of COPD-related inflammation: production and characterization of aerosolizable nano into micro (NiM) particles
Source: Royal Society of Chemistry journal article supplement (doi:10.1039/d3bm01210g), 2023-11-24
Supplement: d3bm01210g1.pdf [file d3bm01210g1.pdf]

SUPPORTING INFORMATION

**Rapamycin – based inhaled therapy for potential treatment of COPD –  
related inflammation: production and characterization of aerosolizable  
Nano into Micro (NiM) particles**

Emanuela Fabiola Craparo<sup>1\*</sup>, Marta Cabibbo<sup>1</sup>, Cinzia Scialabba<sup>1</sup>, Luca Casula<sup>2</sup>, Francesco Lai<sup>2</sup>,  
Gennara Cavallaro<sup>1,3</sup>

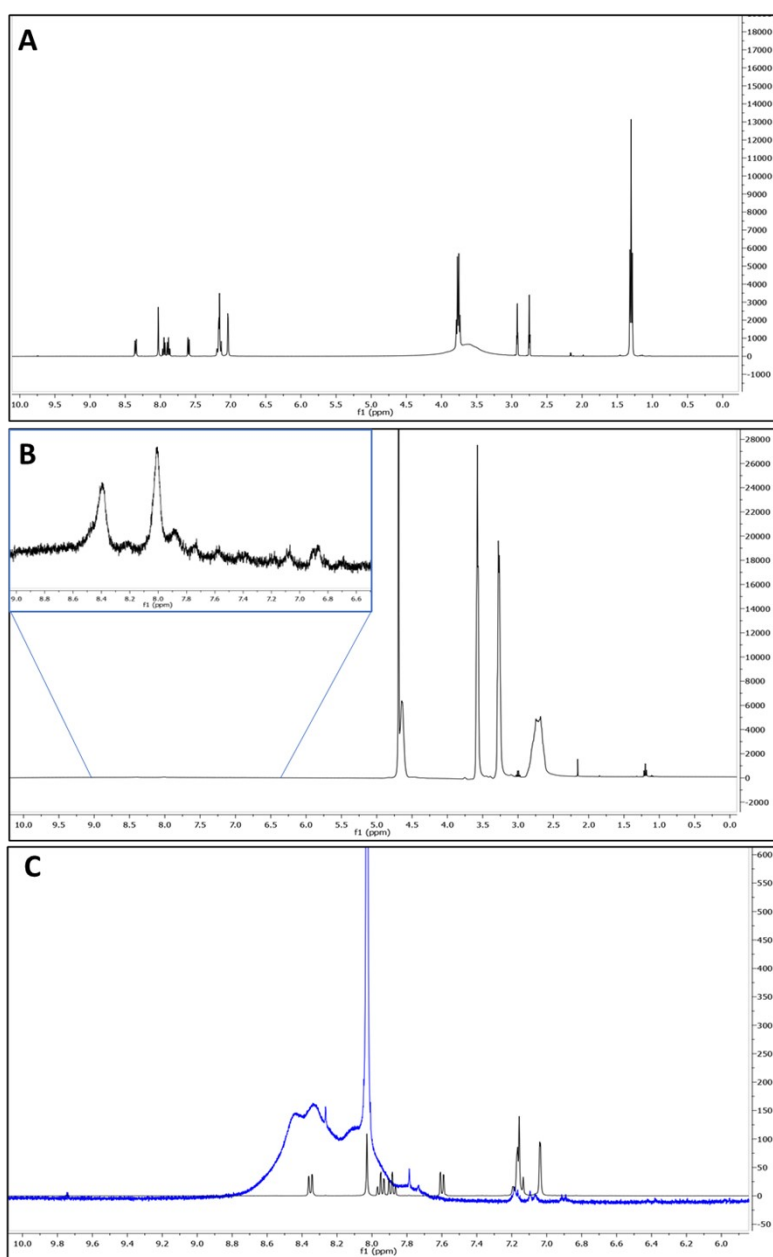

**Fig. S1** 1H-NMR spectrum of RhB in D<sub>2</sub>O (A), PHEA-RhB copolymer in D<sub>2</sub>O (B), and 1H-NMR spectra overlap (at ppm range of 6.0-10.0) of PHEA-g-RhB (blue line) and RhB (black line) in DMF-d<sub>7</sub> (C).

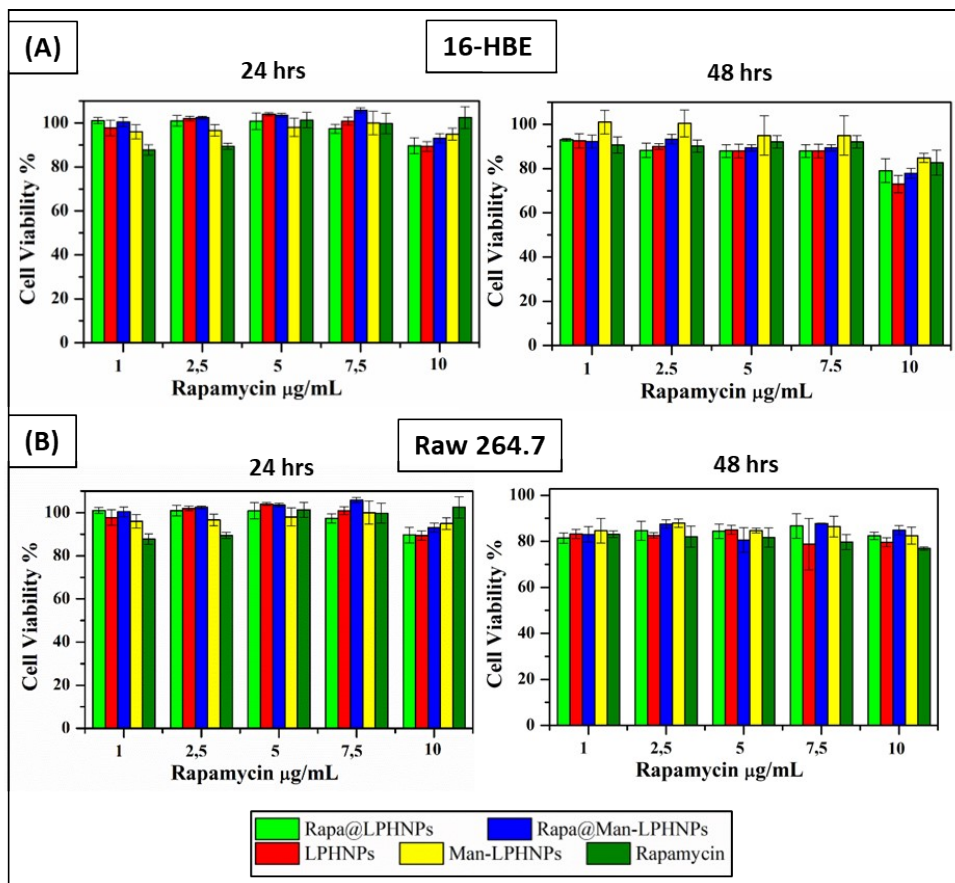

**Fig. S2** Cell viability of 16-HBE (A) and Raw 264.7(B), after 24 hrs (sn) and 48 hrs (dx), after incubation in the presence of: free Rapa, empty and Rapa-loaded Man-LPHNPs at concentrations ranging between 1 - 10 µg/mL. As control samples were tested empty and Rapa-loaded LPHNPs.

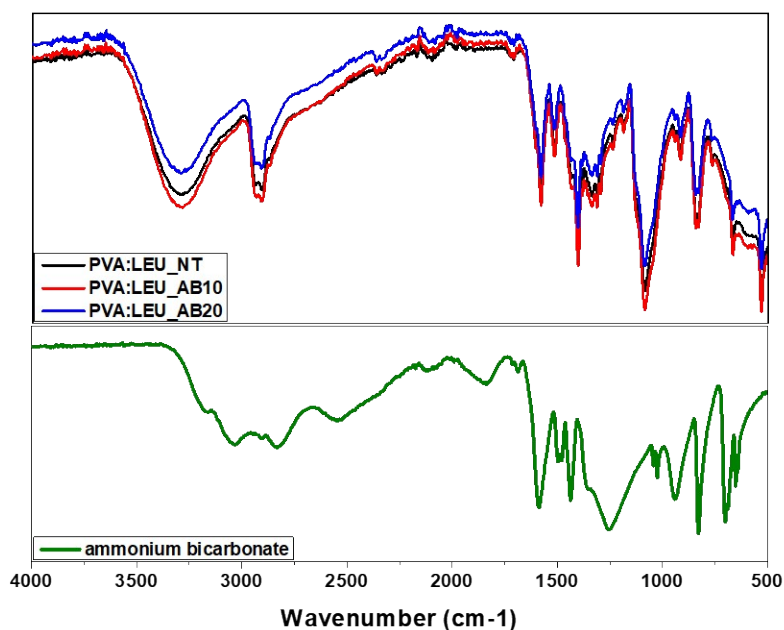

**Figure S3.** FT-IR spectra of PVA:LEU\_NT, PVA:LEU\_AB10 and PVA:LEU\_AB20 samples (top panel) and Ammonium bicarbonate (AB, bottom panel).

**Table S1.** Main transition temperature values of obtained samples.

| Sample                  | T <sub>M</sub> /°C |
|-------------------------|--------------------|
| Polymeric nanoparticles | Peak 1, 43.8       |
|                         | Peak 2, 88.6       |
| Lipid vesicles          | Peak 1, 40.4       |
|                         | Peak 2, 68.8       |
| Rapa@Man-LPHNPs         | Peak 1, 57.6       |
|                         | Peak 2, 97.9       |
| PVA:LEU_AB10            | Peak 1, 215.0      |
|                         | Peak 2, 272.3      |
| NiM@Rapa                | Peak 1, 203.8      |
|                         | Peak 2, 245.0      |

**Table S2.** AB wt% used for the production, yield, geometric and aerodynamic diameter, density of obtained samples.

| Sample       | AB (wt%) | Yield (wt%) | d <sub>g</sub> ± S.D.<br>(μm) | ρ ± S.D. (g/ml) | d <sub>aer</sub> (μm) |
|--------------|----------|-------------|-------------------------------|-----------------|-----------------------|
| PVA:LEU_NT   | 0        | 38.2        | 6.76 ± 2.13                   | 0.615 ± 0.071   | 5.29                  |
| PVA:LEU_AB10 | 10       | 37.4        | 7.70 ± 3.60                   | 0.420 ± 0.060   | 5.00                  |
| PVA:LEU_AB20 | 20       | 38.7        | 7.62 ± 3.01                   | 0.450 ± 0.008   | 5.09                  |
| NiM          | 10       | 37.0        | 6.12 ± 4.27                   | 0.608 ± 0.035   | 4.76                  |
| NiM_Rapa     | 10       | 42.1        | 4.52 ± 3.47                   | 0.523 ± 0.056   | 3.26                  |
